# Supplementary material for: Incidence of Stress Cardiomyopathy During the Coronavirus Disease 2019 Pandemic
Source: PubMed Central journal article supplement (PMC7348683; doi:10.1001/jamanetworkopen.2020.14780), 2020-07-09
Supplement: jamanetwopen-3-e2014780-s001.pdf [file jamanetwopen-3-e2014780-s001.pdf]

## Supplementary Online Content

Jabri A, Kalra A, Kumar A, et al. Incidence of stress cardiomyopathy during the coronavirus disease 2019 pandemic. *JAMA Netw Open*. 2020;3(7):e2014780. doi:10.1001/jamanetworkopen.2020.14780

**eTable.** Incidence Rate Ratios of Stress Cardiomyopathy Comparing the COVID-19 Pandemic Period With Prepandemic Periods

This supplementary material has been provided by the authors to give readers additional information about their work.

**eTable.** Incidence Rate Ratios of Stress Cardiomyopathy Comparing the COVID-19 Pandemic Period With Prepandemic Periods

|                                                                                                                                                 | <b>Risk Ratio</b> | <b>95% CI</b> | <b>P value</b> |
|-------------------------------------------------------------------------------------------------------------------------------------------------|-------------------|---------------|----------------|
| <b>Unadjusted Models</b>                                                                                                                        |                   |               |                |
| COVID19 vs. all pre-COVID19                                                                                                                     | 4.58              | (4.11, 5.11)  | <.0001         |
| COVID19 (Mar - Apr 2020) vs. Jan - Feb 2020                                                                                                     | 4.31              | (1.62, 11.48) | 0.004          |
| COVID19 (Mar - Apr 2020) vs. Mar - Apr 2019                                                                                                     | 4.39              | (2.14, 8.97)  | <.0001         |
| COVID19 (Mar - Apr 2020) vs. Jan - Feb 2019                                                                                                     | 4.79              | (1.80, 12.77) | 0.002          |
| COVID19 (Mar - Apr 2020) vs. Mar - Apr 2018                                                                                                     | 5.04              | (2.02, 12.55) | 0.0005         |
| <b>Adjusted Models</b>                                                                                                                          |                   |               |                |
| HTN: COVID19 vs. all pre-COVID19                                                                                                                | 5.01              | (4.55, 5.51)  | <.0001         |
| HLD: COVID19 vs. all pre-COVID19                                                                                                                | 4.68              | (4.05, 5.40)  | <.0001         |
| CAD: COVID19 vs. all pre-COVID19                                                                                                                | 4.79              | (4.31, 5.32)  | <.0001         |
| Asthma/COPD: COVID19 vs. all pre-COVID19                                                                                                        | 4.16              | (3.87, 4.47)  | <.0001         |
| CAD = coronary artery disease, CI = confidence interval, COPD = chronic obstructive pulmonary disease, HLD = hyperlipidemia, HTN = hypertension |                   |               |                |
